# Supplementary material for: Beyond the Penrose Hypothesis: Examining the Association between the Availability of Psychiatric Care and National Homicide Rates in 166 Countries
Source: Preprints.org preprint supplement (doi:10.20944/preprints202208.0458.v1), 2022-08-26
Supplement: Supplementary file 1 [file Table S1.docx]

**Supplementary Table 1: Complete correlation matrix of all study variables**

| **Var** | **1**  **HT** | **2**  **HM** | **3**  **HF** | **4**  **Psy** | **5**  **PB** | **6**  **GB** | **7**  **GNI** | **8**  **Gini** | **9**  **SC** | **10**  **Unemp** | **11**  **Edu** | **12**  **F20** | **13**  **SUD** | **14**  **Prison** |
| --- | --- | --- | --- | --- | --- | --- | --- | --- | --- | --- | --- | --- | --- | --- |
| **1** | - | **.99**  **(<.001)** | **.94**  **(<.001)** | **-.32**  **(<.001)** | -.10  (.243) | **-.43**  **(<.001)** | **-.37**  **(<.001)** | **.58**  **(<.001)** | -.16  (.093) | .10  (.197) | **-.21**  **(.007)** | **-.35**  **(<.001)** | .01  (.884) | **.32**  **(<.001)** |
| **2** |  | - | **.90**  **(<.001)** | **-.32**  **(<.001)** | -.12  (.175) | **-.44**  **(<.001)** | **-.39**  **(<.001)** | **.57**  **(<.001)** | -.18  (.058) | .09  (.267) | **-.22**  **(.005)** | **-.35**  **(<.001)** | -.01  (.916) | **.32**  **(<.001)** |
| **3** |  |  | - | **-.28**  **(.001)** | -.04  (.676) | **-.33**  **(<.001)** | **-.31**  **(<.001)** | **.51**  **(<.001)** | -.11  (.218) | .15  (.066) | **-.18**  **(.024)** | **-.33**  **(<.001)** | .07  (.368) | **.26**  **(.001)** |
| **4** |  |  |  | - | **.66**  **(<.001)** | **.64**  **(<.001)** | **.81**  **(<.001)** | **-.38**  **(<.001)** | **.42**  **(<.001)** | **.23**  **(.007)** | **.80**  **(<.001)** | **.86**  **(<.001)** | **.70**  **(<.001)** | **.37**  **(<.001)** |
| **5** |  |  |  |  | - | **.41**  **(<.001)** | **.50**  **(<.001)** | **-.38**  **(<.001)** | **.20**  **(.047)** | **.21**  **(.022)** | **.68**  **(<.001)** | **.56**  **(<.001)** | **.54**  **(<.001)** | **.27**  **(.002)** |
| **6** |  |  |  |  |  | - | **.52**  **(<.001)** | **-.31**  **(.002)** | **.38**  **(<.001)** | **.21**  **(.027)** | **.53**  **(<.001)** | **.49**  **(<.001)** | **.46**  **(<.001)** | .11  (.261) |
| **7** |  |  |  |  |  |  | - | **-.29**  **(<.001)** | **.57**  **(<.001)** | .14  (.076) | **.79**  **(<.001)** | **.83**  **(<.001)** | **.60**  **(<.001)** | **.27**  **(<.001)** |
| **8** |  |  |  |  |  |  |  | - | -.03  (.769) | .03  (.711) | **-.27**  **(.001)** | **-.39**  **(<.001)** | -.13  (.125) | **.21**  **(.013)** |
| **9** |  |  |  |  |  |  |  |  | - | -.13  (.147) | **.44**  **(<.001)** | **.42**  **(<.001)** | **.40**  **(<.001)** | .07  (.460) |
| **10** |  |  |  |  |  |  |  |  |  | - | **.23**  **(.004)** | .09  (.239) | **.171**  **(.032)** | .057  (.483) |
| **11** |  |  |  |  |  |  |  |  |  |  | - | **.83**  **(<.001)** | **.70**  **(<.001)** | **.40**  **(<.001)** |
| **12** |  |  |  |  |  |  |  |  |  |  |  | - | **.67**  **(<.001)** | **.40**  **(<.001)** |
| **13** |  |  |  |  |  |  |  |  |  |  |  |  | - | **.42**  **(<.001)** |

**Abbreviations:** HT, total homicide rate (Global Burden of Disease 2019); HM, male homicide rate (Global Burden of Disease 2019); HF, female homicide rate (Global Burden of Disease 2019); Psy, number of psychiatrists per 100,000 population (World Health Organization 2015-16); PB, number of dedicated psychiatric beds per 100,000 population (World Health Organization 2015-16); GB, number of general hospital psychiatric beds per 100,000 population (World Health Organization 2015-16); GNI, gross national income per capita (PPP method, US$); Gini, Gini coefficient of income inequality; SC, social capital (Legatum Index, social capital sub-scale score); Unemp, unemployment rate (%); Edu, average years of education per adult; F20, estimated prevalence of schizophrenia (Global Burden of Disease 2015); SUD, estimated prevalence of substance use disorders (Global Burden of Disease 2015); Prison, national prison population (number of inmates per 100,000 population).

**Notes:**

1. All values are given as correlation coefficient (Pearson’s *r)* and significance level for a two-tailed test.
2. Values significant at *p* < .05 are indicated in **bold**.
